# Supplementary material
Source: bioRxiv or medRxiv preprint supplement (https://www.biorxiv.org/highwire/filestream/11119/field_highwire_adjunct_files/0/041012-1.pdf)
Supplement: Supplementary file [file 041012-1.pdf]

## Supporting Information

**S1 Table. Morpholino oligonucleotides used:**

| Target Gene        | Sequence                                | Mode of Action       |
|--------------------|-----------------------------------------|----------------------|
| <i>foxc1a</i> -MO2 | 5'-CCT-GCA-TGA-CTG-CTC-TCC-AAA-ACG-G-3' | Translation blocking |
| <i>rippy1</i> -MO  | 5'-CAT-CGT-CAC-TGT-GTT-TTT-CGT-TTT-G-3' | Translation blocking |

**S2 Table. Primers used for mRNA probe preparation:**

| Target Gene    | Forward primer                      | Reverse primer                                                        | Probe size (bp) [source] |
|----------------|-------------------------------------|-----------------------------------------------------------------------|--------------------------|
| <i>mesp-ba</i> | 5'-GCA-AAC-CTC-AAG-CAA-GAA-CC-3'    | 5'- GAA-ATT-AAT-ACG-ACT-CAC-TAT-AGG-TAC-CGC-TCC-CTG-TAT-TGT-CC-3'     | 549                      |
| <i>foxc1a</i>  | 5'-GAG-ACA-TTG-GCC-ATC-TAG-GC-3'    | 5'- GAA-ATT-AAT-ACG-ACT-CAC-TAT-AGG-CTG-ACG-CAT-TTC-AAC-ACA-GC-3'     | 437                      |
| <i>rippy1</i>  | 5'-CTG-TGT-GCT-TTG-CCA-CTC-C-3'     | 5'- GAA-ATT-AAT-ACG-ACT-CAC-TAT-AGG-CAT-CAT-CTT-CAT-CAC-AGC-TTT-CC-3' | 467                      |
| <i>tbx6</i>    | 5'-CAA-TCA-ATC-CCT-GCT-TGT-C-3'     | 5'- GAA-ATT-AAT-ACG-ACT-CAC-TAT-AGG-CGA-GGA-TCC-TGG-CAA-AG-3'         | 1067 [35]                |
| <i>fgf8a</i>   | 5'-TCT-TCG-TAT-TGC-TGC-TCA-AGG-G-3' | 5'- GAA-ATT-AAT-ACG-ACT-CAC-TAT-AGG-TAT-CCT-AAG-GTA-AAT-TTA-TTA-C-3'  | 453                      |
